1 Assessing the effect of hypoxia on cardiac metabolism using hyperpolarized  $^{13}\text{C}$  magnetic  
2 resonance spectroscopy

3

4 (Short Title – *Le Page et al: Assessing the response of cardiac metabolism to hypoxia with  $^{13}\text{C}$  MRS*)

5

6 Lydia M. Le Page<sup>1,2,3</sup>, Oliver J. Rider<sup>4</sup>, Andrew J. Lewis<sup>4</sup>, Victoria Noden<sup>1</sup>, Matthew Kerr<sup>1</sup>, Lucia  
7 Giles<sup>1</sup>, Lucy J. A. Ambrose<sup>1</sup>, Vicky Ball<sup>1</sup>, Latt Mansor<sup>1</sup>, Lisa C. Heather<sup>1\*</sup>, and Damian J. Tyler<sup>1,4\*</sup>

8

9 <sup>1</sup>Department of Physiology, Anatomy and Genetics, University of Oxford, Oxford, UK

10 <sup>2</sup>Department of Physical Therapy and Rehabilitation Science, University of California, San  
11 Francisco, San Francisco, USA

12 <sup>3</sup>Department of Radiology and Biomedical Imaging, University of California, San Francisco, San  
13 Francisco, USA

14 <sup>4</sup>Oxford Centre for Clinical Magnetic Resonance Research, Division of Cardiovascular Medicine,  
15 University of Oxford, Oxford, UK

16 \*joint last author

17

18 *Corresponding author:*

19 Dr Lydia Le Page, Departments of Physical Therapy and Rehabilitation Science, and Radiology  
20 and Biomedical Imaging, University of California, San Francisco, San Francisco, 94158, CA, USA.

21 Email: [Lydia.lepage@ucsf.edu](mailto:Lydia.lepage@ucsf.edu)

22

23 Word Count: 3,152

24 Key words: hyperpolarized  $^{13}\text{C}$ , cardiac metabolism, hypoxia, magnetic resonance spectroscopy

25 Abbreviations: HP: hyperpolarized; PDH: pyruvate dehydrogenase; LDH: lactate dehydrogenase;

26 BOLD: blood-oxygen-level dependent; PET: positron emission tomography; PDK: pyruvate

27 dehydrogenase kinase; HIF: hypoxia-inducible factor

28 **Abstract summary**

29 Hypoxia plays a role in many diseases and can have a wide range of effects on cardiac metabolism  
30 depending on the extent of the hypoxic insult. Non-invasive imaging methods could shed valuable  
31 light on the metabolic effects of hypoxia on the heart *in vivo*. Hyperpolarized carbon-13 magnetic  
32 resonance spectroscopy (HP <sup>13</sup>C MRS) in particular is an exciting technique for imaging  
33 metabolism that could provide such information.

34 The aim of our work was, therefore, to establish whether hyperpolarized <sup>13</sup>C MRS can be used to  
35 assess the *in vivo* response of cardiac metabolism to systemic acute and chronic hypoxic exposure.  
36 Groups of healthy male Wistar rats were exposed to either acute (30 minutes), one week or three  
37 weeks of hypoxia. *In vivo* MRS of hyperpolarized [1-<sup>13</sup>C]pyruvate was carried out along with  
38 assessments of physiological parameters and ejection fraction. No significant changes in heart  
39 rate, respiration rate, or ejection fraction were observed at any timepoint. Haematocrit was  
40 elevated after one week and three weeks of hypoxia.

41 Thirty minutes of hypoxia resulted in a significant reduction in pyruvate dehydrogenase (PDH)  
42 flux, whereas one or three weeks of hypoxia resulted in a PDH flux that was not different to  
43 normoxic animals. Conversion of hyperpolarized [1-<sup>13</sup>C]pyruvate into [1-<sup>13</sup>C]lactate was elevated  
44 following acute hypoxia, suggestive of enhanced anaerobic glycolysis. Elevated HP pyruvate to  
45 lactate conversion was also seen at the one-week timepoint, in concert with an increase in lactate  
46 dehydrogenase (LDH) expression. Following three weeks of hypoxic exposure, cardiac  
47 metabolism was comparable to that observed in normoxia.

48 We have successfully visualized of the effects of systemic hypoxia on cardiac metabolism using  
49 hyperpolarized <sup>13</sup>C MRS, with differences observed following 30 minutes and 1 week of hypoxia.  
50 This demonstrates the potential of *in vivo* hyperpolarized <sup>13</sup>C MRS data for assessing the  
51 cardiometabolic effects of hypoxia in disease.

## 52 **Introduction**

53 Oxygenation of tissue is key to survival and maintenance of organ health. The heart has the  
54 potential to be exposed to a spectrum of hypoxic insults, ranging from mild and transient, to  
55 prolonged and severe. The metabolic effects of acute hypoxia are well documented, and notably  
56 involve increased glycolytic flux and transient lactate acidosis<sup>1,2</sup>. Prolonged and severe hypoxia  
57 requires reprogramming of cardiac metabolism; the heart downregulates oxygen-consuming  
58 processes and upregulates glycolysis in an attempt to maximize ATP production under oxygen  
59 restricted conditions<sup>3-5</sup>. The effects of chronic hypoxia are observed in response to high altitude<sup>6</sup>,  
60 or as a factor in many pathological conditions; examples include chronic obstructive pulmonary  
61 disease<sup>7</sup>, complications in pregnancy<sup>8</sup>, sleep apnoea<sup>9</sup>, myocardial infarction (the peri-infarct  
62 region)<sup>10</sup> and heart failure<sup>11</sup>.

63 However, much of this existing literature relies on *ex vivo* assessment of the metabolic changes  
64 that occur. As such, non-invasive *in vivo* measures of the effect of oxygen levels on cardiac tissue  
65 would be valuable, especially as the hypoxic response can be very transient<sup>12</sup>. Imaging techniques  
66 have begun to probe *in vivo* oxygen levels, and current prominent methods include blood-oxygen-  
67 level dependent (BOLD) MRI and positron emission tomography (PET) imaging, although neither  
68 is standard clinical practice as yet. BOLD MRI enables assessment of vascular oxygenation, using  
69 the paramagnetic nature of deoxyhaemoglobin to create image contrast<sup>13</sup>; this technique has not  
70 yet reached the clinic due to a combination of many challenges including low signal-to-noise and  
71 a need for robust analysis<sup>14</sup>, which studies have begun to address<sup>15</sup>. There is also an ongoing  
72 search for PET probes to assess hypoxia, the most promising of which is currently <sup>11</sup>C-acetate.  
73 Clearance of this tracer is dependent on oxidative metabolism, and so accumulation indicates low  
74 oxygen presence<sup>16</sup>. It does, however, have a short half-life<sup>17</sup> and so usage depends on a nearby  
75 cyclotron, and as with all PET options, patients will be exposed to ionizing radiation which may  
76 prohibit repeated measurements.

77 Spectroscopic imaging holds potential for providing non-invasive, non-radioactive metabolic  
78 data. Imaging of carbon-13 (<sup>13</sup>C) in particular can be very informative given the abundance of

*Le Page et al: Assessing the response of cardiac metabolism to hypoxia with <sup>13</sup>C MRS*

79 carbon present in metabolites, including those in pathways affected by oxygen level. Although <sup>13</sup>C  
80 spectroscopy suffers from inherently low sensitivity *in vivo*, the advent of hyperpolarized <sup>13</sup>C  
81 magnetic resonance spectroscopy (HP <sup>13</sup>C MRS) offers the unique ability to measure the rate of  
82 enzyme flux *in vivo*<sup>18</sup>. It provides an enhancement of the <sup>13</sup>C signal of >10,000 fold, and as such,  
83 enables a non-invasive measurement of enzymatic flux in real time. In the heart, the glycolytic  
84 pathway is central to the metabolic changes that occur as oxygen levels fall. The most established  
85 hyperpolarized <sup>13</sup>C-labelled probe, [1-<sup>13</sup>C] pyruvate, is relevant to this pathway, as it allows us to  
86 visualise the fate of pyruvate either through mitochondrial pyruvate dehydrogenase (PDH) to  
87 bicarbonate, or through cytosolic lactate dehydrogenase (LDH) into lactate<sup>19</sup>. A previous study by  
88 Laustsen *et al.*<sup>20</sup> showed the value of hyperpolarized pyruvate in the investigation of hypoxia in  
89 the diabetic rat kidney – demonstrating an ability to measure increased lactate production after  
90 fifteen minutes of hypoxic anaesthesia. Hypoxia is also one of many pathological factors of tumor  
91 development<sup>21</sup>, fluctuating over time and in regions of the tumor<sup>22</sup>, and as such Iveson *et al.* used  
92 HP <sup>13</sup>C MRS in a mouse tumor model, showing that inspiration of a hypoxic atmosphere caused  
93 increased lactate production in tumors<sup>23</sup>. Oxidative stress has been investigated in a few non-  
94 cardiac studies, using HP dehydroascorbate<sup>24,25</sup>, but the toxicity of this compound may limit  
95 translation to clinical studies<sup>26</sup>. Indeed, the challenges and future of hyperpolarized probes for  
96 assessing renal and cardiac oxygen metabolism have been discussed in a review by Schroeder  
97 and Laustsen<sup>27</sup>. Thus far, no studies have investigated the use of HP <sup>13</sup>C MRS to assess the effect  
98 of hypoxia on glucose metabolism in the *in vivo* heart.

99 In this study we have therefore assessed the effect of three lengths of hypoxic exposure – thirty  
100 minutes, one week, and three weeks - on the *in vivo* rat heart, using hyperpolarized [1-<sup>13</sup>C]  
101 pyruvate. We have measured the conversion of HP pyruvate to bicarbonate, lactate and alanine  
102 (**Figure 1A** shows the biochemical pathways involved). The level of oxygen saturation in the  
103 blood was matched across groups, and established following measurement in animals housed at  
104 11% oxygen from previous rodent studies in our laboratory<sup>3,4</sup>. Alongside cardiac metabolism by  
105 MRS, we assessed ejection fraction by CINE MRI imaging, and measured heart rate and respiration

*Le Page et al: Assessing the response of cardiac metabolism to hypoxia with <sup>13</sup>C MRS*

106 rate in all groups. We further measured body weight and haematocrit in the longer exposure  
107 groups (1 week and 3 weeks hypoxia). In these latter groups, expression levels of cardiac PDH  
108 regulators pyruvate dehydrogenase kinase (PDK) 1, 2 and 4, and the expression level of lactate  
109 dehydrogenase (LDH), responsible for conversion of pyruvate to lactate, were also measured in  
110 cardiac tissue.

## 111 **Methods**

112 **Animal handling:** Male Wistar rats (initial body weight ~200 g, Harlan, UK) were housed on a  
113 12:12-h light/dark cycle in animal facilities at the University of Oxford. All imaging studies were  
114 performed between 6 am and 1 pm with animals in the fed state. All procedures conformed to the  
115 Home Office Guidance on the Operation of the Animals (Scientific Procedures) Act of 1986 and to  
116 University of Oxford institutional guidelines.

117

### 118 ***Hypoxic exposure***

119 A group of hypoxically-housed animals (n=6) and a group of animals housed in normoxia (n=4)  
120 were used to assess blood oxygen saturation. Saturation was measured to be  $74\pm 2\%$  (**Figure 1B**)  
121 in hypoxia, using a pulse oximeter on their hind paw (MouseOx, Starr Life Sciences). This  
122 concentration was subsequently matched for all hypoxic exposures.

123

### 124 ***Experimental groups for in vivo imaging***

125 Three groups of animals were exposed to three different lengths of hypoxia. Control groups  
126 experienced normoxia only. The groups are summarized in **Figure 1C**.

127

128 ***Thirty minutes (acute) hypoxia:*** Animals (n=9) were anaesthetised using isoflurane (2%) in  
129 100% O<sub>2</sub> (2L/min). Metabolic and functional data were acquired in normoxia as described in the  
130 imaging protocol below. Animals were then slowly introduced to hypoxia by increasing  
131 replacement of oxygen with nitrogen over thirty minutes, until a blood oxygen saturation which  
132 matched that of the animals housed in the hypoxic chamber was achieved (described above). A  
133 second injection of hyperpolarized [1-<sup>13</sup>C]pyruvate was administered and a second data set  
134 acquired. Acute hypoxia elicited some rapid physiological responses such as increased ventilation  
135 and heart rate<sup>28</sup>, which settled prior to data acquisition, allowing acquisition of data in a stable  
136 hypoxic state.

137

*Le Page et al: Assessing the response of cardiac metabolism to hypoxia with <sup>13</sup>C MRS*

138 **One week of hypoxia:** Animals (n=8) were housed in a normobaric hypoxic chamber for one  
139 week, during which time the oxygen concentration was reduced daily by 1-2% until at the final  
140 day the concentration was 11%. Animals were weighed daily, which resulted in brief exposure to  
141 normoxia (no longer than 5 minutes). Animals were subsequently anaesthetised under hypoxia  
142 (O<sub>2</sub>/N<sub>2</sub> mix) outside the chamber, before being placed in the magnet and the imaging protocol.  
143 executed. A control group (n=6) was housed outside the hypoxic chamber in room air (21%  
144 oxygen) for one week from which normoxic data were acquired.

145

146 **Three weeks of hypoxia:** Animals (n=8) were introduced to the normobaric hypoxic chamber as  
147 for the one-week experiments, but remained in the chamber for a further 14 days at 11% oxygen.  
148 Animals were then anaesthetised under hypoxia outside the chamber (O<sub>2</sub>/N<sub>2</sub> mix) and underwent  
149 the MR protocol as for the one-week animals, to obtain *in vivo* cardiac metabolic data. A control  
150 group (n=8) was housed outside the hypoxic chamber in room air (21% oxygen) for three weeks  
151 from which normoxic data were acquired.

152

153 **Magnetic resonance (MR) protocol:** Animals were anaesthetised with isoflurane (3.5%  
154 induction and 2% maintenance). Rats were positioned in a 7 T horizontal bore MR scanner  
155 interfaced to a Direct Drive console (Varian Medical Systems, Yarnton, UK), and a home-built  
156 <sup>1</sup>H/<sup>13</sup>C butterfly coil (loop diameter, 2 cm) was placed over the chest. Correct positioning was  
157 confirmed by the acquisition of an axial proton fast low-angle shot (FLASH) image (TE/TR,  
158 1.17/2.33 ms; matrix size, 64 x 64; FOV, 60 x 60 mm; slice thickness, 2.5 mm; excitation flip angle,  
159 15°). An ECG-gated axial CINE image was obtained (slice thickness:1.6 mm, matrix size:128×128,  
160 TE/TR:1.67/4.6 ms, flip angle:15°) at the level of the papillary muscles for ejection fraction  
161 calculation. An ECG-gated shim was used to reduce the proton linewidth to ~120 Hz.  
162 Hyperpolarized [1-<sup>13</sup>C]pyruvate (Sigma-Aldrich, Gillingham, UK) was prepared by 40 minutes of  
163 hyperpolarization at ~1K as described by Ardenkjaer-Larsen *et al.*<sup>18</sup>, before being rapidly  
164 dissolved in a pressurised and heated alkaline solution. This produced a solution of 80 mM

*Le Page et al: Assessing the response of cardiac metabolism to hypoxia with <sup>13</sup>C MRS*

165 hyperpolarized sodium [1-<sup>13</sup>C]pyruvate at physiological temperature and pH, with a polarization  
166 of ~30%. One millilitre of this solution was injected over ten seconds via a tail vein cannula (dose  
167 of ~0.32 mmol/kg). Sixty individual ECG-gated <sup>13</sup>C MR slice selective, pulse-acquire cardiac  
168 spectra were acquired over 60 s after injection (TR, 1 s; excitation flip angle, 5°; slice thickness  
169 10 mm, sweep width 13,593 Hz; acquired points 2,048; frequency centred on the C1 pyruvate  
170 resonance)<sup>29</sup>.

171

172 **Tissue collection:** All animals were sacrificed with an overdose of isoflurane following  
173 completion of the MR protocol. The heart was rapidly removed, washed briefly in phosphate  
174 buffered saline, and snap-frozen in liquid nitrogen.

175

176 **Blood analyses:** Samples of blood were collected from the chest cavity on sacrificing, and  
177 centrifuged at 8,000 rpm for 10 minutes. Haematocrit was measured using a microhaematocrit  
178 reader (Hawksley, UK).

179

180 **Tissue analysis:** For Western blotting of cardiac tissue from one week and three week groups,  
181 frozen tissue was crushed and lysis buffer added before tissue was homogenised; a protein assay  
182 established the protein concentration of each lysate. The same concentration of protein from each  
183 sample was loaded on to 12.5% SDS-PAGE gels and separated by electrophoresis<sup>30</sup>. Primary  
184 antibodies for PDK 1 and 2 were purchased from New England Biolabs and Abgent, respectively;  
185 an antibody for PDK4 was kindly donated by Prof. Mary Sugden (Queen Mary's, University of  
186 London, UK). A primary antibody for LDH was purchased from Abcam (ab52488). Even protein  
187 loading and transfer were confirmed by Ponceau staining (0.1% w/v in 5% v/v acetic acid, Sigma-  
188 Aldrich), and internal standards were used to ensure homogeneity between samples and gels.  
189 Bands were quantified using UN-SCAN-IT gel software (Silk Scientific, USA) and all samples were  
190 run in duplicate on separate gels to confirm results.

191



*Le Page et al: Assessing the response of cardiac metabolism to hypoxia with <sup>13</sup>C MRS*

192 **Magnetic resonance data analysis:** All cardiac <sup>13</sup>C spectra were analysed using the AMARES  
193 algorithm in the jMRUI software package<sup>31</sup>. **Figure 1D** shows example spectra summed over 30  
194 seconds of acquisition in normoxic animals, acutely hypoxic animals and animals housed in  
195 hypoxia for one and three weeks, showing cardiometabolic conversion of the injected  
196 hyperpolarized pyruvate into the downstream products lactate, alanine and bicarbonate. Spectra  
197 were DC offset-corrected based on the last half of acquired points. The peak areas of [1-  
198 <sup>13</sup>C]pyruvate, [1-<sup>13</sup>C]lactate, [1-<sup>13</sup>C]alanine and [<sup>13</sup>C]bicarbonate at each time point were  
199 quantified and used as input data for a kinetic model based on that developed by Zierhut *et al.*<sup>32</sup>  
200 and Atherton *et al.*<sup>33</sup>. PDH flux was quantified as the rate of <sup>13</sup>C label transfer from pyruvate to  
201 bicarbonate. The rate of <sup>13</sup>C label transfer from pyruvate to lactate and alanine was used as a  
202 marker of lactate dehydrogenase activity and alanine aminotransferase activity respectively.  
203 CINE images were analyzed using cmr42 software (Circle Cardiovascular Imaging, Calgary,  
204 Canada) by an experienced analyst blinded to experimental group.

205

206 **Statistical analyses:** No significant differences were observed between the three normoxic  
207 groups (acute, one week and three weeks) for any parameter, therefore all normoxic values were  
208 combined for subsequent analysis. Values are reported as the mean ± standard deviation.  
209 Differences between groups were assessed using a one-way ANOVA followed by a Tukey's  
210 multiple comparisons test. This was performed using GraphPad Prism version 6.0g for Mac OS X  
211 (GraphPad Software, La Jolla California USA, [www.graphpad.com](http://www.graphpad.com)). Statistical significance was  
212 considered if  $p \leq 0.05$ .

213 **Results**

214 Oxygen saturation was successfully reduced in all hypoxic groups compared with normoxic data  
215 (**Figure 2A**).

216

217 **Physiological Effects of Hypoxia:** Hypoxia did not significantly affect *in vivo* heart rate,  
218 respiration rate or left ventricular ejection fraction in any group (**Figure 2B, C, D**). However, the  
219 ANOVA for heart rate gave a p value of 0.051, and so a comparison between the 30 minute and 1-  
220 week hypoxia data should be noted ( $p=0.04$ ). One week of hypoxia caused a significant increase  
221 in haematocrit compared to normoxia ( $49.3\pm 0.6\%$  and  $43\pm 2\%$  respectively), and haematocrit in  
222 three-week hypoxic animals was significantly increased compared to one-week and normoxic  
223 values ( $58\pm 2\%$ ) (**Figure 2E**); this demonstrates systemic adaptation to hypoxia over time.

224 Animals housed in hypoxia for one week showed significantly lower body weights than normoxic  
225 animals. Following three weeks of hypoxia however, body weights were no different from  
226 controls.

227

228 **Metabolic Effects of Hypoxia:**

229 **In vivo data:** Following 30 minutes of hypoxia, animals demonstrated a significant reduction in  
230 PDH flux (50%) compared to normoxic animals ( $0.009\pm 0.003\text{ s}^{-1}$  and  $0.017\pm 0.007\text{ s}^{-1}$   
231 respectively; **Figure 3A**). In contrast, both 1 and 3 weeks of hypoxic exposure did not show  
232 significantly altered PDH flux, with values not significantly different from controls (one-week  
233 hypoxia:  $0.013\pm 0.007\text{ s}^{-1}$ ; three-weeks hypoxia:  $0.017\pm 0.011\text{ s}^{-1}$ ; normoxia:  $0.017\pm 0.007\text{ s}^{-1}$ ).

234

235 A significant (58%) increase in HP  $^{13}\text{C}$  label transfer to lactate (**Figure 3B**), was observed in  
236 comparing 30 minutes hypoxic exposure to normoxic data ( $0.032\pm 0.008\text{ s}^{-1}$  and  $0.020\pm 0.006\text{ s}^{-1}$   
237 respectively), indicative of a short-term metabolic shift towards anaerobic metabolism. After one  
238 week of hypoxia, the unchanged PDH flux was accompanied by an increased rate of  $^{13}\text{C}$  label  
239 transfer to lactate (by 40%) compared to normoxic animals ( $0.028\pm 0.008\text{ s}^{-1}$  and  $0.020\pm 0.006\text{ s}^{-1}$ ).

*Le Page et al: Assessing the response of cardiac metabolism to hypoxia with <sup>13</sup>C MRS*

240 <sup>1</sup> respectively). No difference in flux to <sup>13</sup>C lactate was observed following three weeks of hypoxia  
241 compared to normoxic data (0.023±0.002 s<sup>-1</sup> and 0.020±0.001 s<sup>-1</sup> respectively). No change in the  
242 rate of <sup>13</sup>C label transfer to alanine was seen at any timepoint (**Figure 3C**).

243

244 **Biochemical analyses:**

245 Cardiac tissue from the one-week and three-week hypoxic groups was assessed *ex vivo*. In  
246 agreement with the unchanged PDH flux at both these timepoints, no significant differences in  
247 the protein expression levels of the regulatory cardiac PDK isoforms (1, 2 and 4) were observed  
248 (**Figure 4**). A significantly higher expression of LDH was observed in the 1-week hypoxic tissue,  
249 in line with the increased HP pyruvate to lactate conversion seen *in vivo*.

250

## 251 Discussion

252 In hypoxia, metabolic changes have to occur in order for cardiac function to be maintained under  
253 these oxygen-restricted conditions. Firstly considering the response to acute hypoxia, the heart  
254 must rapidly shift metabolism towards a more anaerobic phenotype, which is characterised by  
255 increased glycolysis, increased lactate efflux<sup>34</sup> and decreased oxidative mitochondrial  
256 metabolism. Indeed, in the animals exposed to 30 minutes of hypoxia, cardiac pyruvate to lactate  
257 conversion *in vivo* was significantly increased, and PDH flux significantly decreased. The rapid  
258 response that we observed, in line with the expected metabolic signature of anaerobic  
259 respiration, is likely mediated by changes in the NAD<sup>+</sup>/NADH ratio as a direct result of the  
260 decreased oxygen availability<sup>35</sup>. The reduced oxygen results in decreased mitochondrial  
261 respiration<sup>4</sup>, increasing NADH, inhibiting NAD-dependent dehydrogenases such as PDH and  
262 promoting NADH-dependent dehydrogenases such as LDH.

263 After one week of hypoxic exposure, we observed a significantly increased haematocrit level, as  
264 the animals underwent adaptation to the increasing level of hypoxia. This potentially indicates a  
265 partial adaptation to the hypoxic environment, a particularly viable suggestion when considered  
266 alongside the three-week haematocrit data, which shows an additional significant increase in  
267 haematocrit. This hypothesis of 'interim' adaptation is supported by a trend to increased heart  
268 rate as a compensatory mechanism to ensure sufficient systemic oxygen delivery, and a  
269 significantly reduced body weight. Similar parameters have been observed in humans adapting  
270 to altitude showing increased heart rate<sup>36</sup> and a lower calorie intake<sup>37</sup>, the latter of has been  
271 suggested to be due to increased leptin levels<sup>38</sup>.

272 The increased haematocrit level demonstrated by our one-week and three-week hypoxic animals  
273 is a hallmark of systemic adaptation to physiological hypoxia, driven by HIF-2 $\alpha$ -stimulated  
274 production of erythropoietin<sup>39,40</sup>. Glycolytic changes have been reported to be predominantly  
275 HIF-1 $\alpha$ -regulated<sup>41</sup> such as that of lactate dehydrogenase<sup>42</sup>, the enzyme responsible for the HP  
276 conversion we measured *in vivo*. Glycolytically derived lactate was increased in the one-week  
277 hypoxic animals, as assessed by HP pyruvate to lactate conversion, in line with significantly

*Le Page et al: Assessing the response of cardiac metabolism to hypoxia with <sup>13</sup>C MRS*

278 increased LDH expression in comparison to normoxic data. PDH flux was not decreased, which  
279 was supported by our assessment of expression levels of its PDK regulators, perhaps  
280 unexpectedly due to previous studies discussing the hypoxia-inducible nature of PDK1<sup>43,44</sup>. Our  
281 three-week hypoxic exposure also resulted in no metabolic differences (in the conversion of HP  
282 pyruvate to lactate or bicarbonate) in comparison with normoxic data, as supported by measures  
283 of PDK and LDH expression.

284 Much research has however focussed on the effect of hypoxia on PDK expression in cell culture.  
285 Kim *et al.*<sup>43</sup> and Papandreou *et al.*<sup>44</sup> showed upregulation of PDK1, in mouse embryonic fibroblasts  
286 following 24-72h in 0.5% hypoxia. Genetic over-activation of HIF1 $\alpha$  increases PDK1 and 4 protein  
287 levels in muscle<sup>45</sup>. It has generally been assumed that this translates to the heart, in the *in vivo*  
288 setting. Equally, measured changes in these regulatory kinases have been extrapolated to mean a  
289 change in PDH activity. However, our data suggests that this may not enable comment on long-  
290 term *in vivo* cardiac hypoxia. Indeed, a study by Le Moine *et al.* demonstrated no elevation of PDK1  
291 expression in skeletal muscle following one week of hypoxic exposure<sup>46</sup>. Previous studies from  
292 our group have shown that this three-week protocol of chronic hypoxia at 11% oxygen is  
293 sufficient to metabolically reprogram the heart specifically to become more oxygen efficient<sup>5</sup> in  
294 ways not assessed in this study. Further, studies in animal models of hypertrophy have revealed  
295 unchanged PDH activity<sup>47,48</sup> and no differences in PDK isoforms, which appeared at odds with  
296 cellular studies on hypoxia. Our data contributes to these observations and may in future help  
297 explain the situation in disease.

298

299 **Limitations**

300 This study did not measure *ex vivo* PDH activity, which could contribute to the *in vivo* HP  
301 measures, and could be altered in spite of unchanged PDK expression. However the work by Le  
302 Moine *et al.* demonstrated that *ex vivo* skeletal PDH activity in mice exposed to one week of  
303 hypoxia was unchanged compared to normoxic animals<sup>49</sup>. Concomitantly, work by Atherton *et al.*

*Le Page et al: Assessing the response of cardiac metabolism to hypoxia with <sup>13</sup>C MRS*

304 demonstrated a significant correlation between *in vivo* data acquired using HP [1-<sup>13</sup>C] pyruvate  
305 and PDH activity assessed from *ex vivo* tissue<sup>50</sup>, strengthening the validity of our *in vivo* HP data.  
306 A pulse-acquire sequence was used in this study, and data acquired using a surface coil. Future  
307 work could involve implementing a more elegant acquisition protocol<sup>51</sup> to provide more  
308 information on regional hypoxia within the heart.  
309 Finally, normoxic animals were imaged using 100% oxygen, which, although common procedure  
310 in preclinical animal studies, may exacerbate the differences we have seen here. Future studies  
311 could include anaesthesia at a lower oxygen percentage.

312

313 **Conclusion**

314 In conclusion, we have demonstrated the ability of HP [1-<sup>13</sup>C] pyruvate to non-invasively assess  
315 metabolic changes in the healthy heart in response to three lengths of exposure to hypoxia. This  
316 could therefore be a viable technique for assessing hypoxia in a wide range of diseases and in  
317 response to therapy.

318 **Funding**

319 This study was funded by grants from the British Heart Foundation (FS/10/002/28078,  
320 FS/14/17/30634) and Diabetes UK (11/0004175) and equipment support was provided by GE  
321 Healthcare.

322

323 **Acknowledgements**

324 The authors would like to thank Dr. Louise Upton and Prof. Mary Sugden for the kind provision  
325 of the pulse oximeter and a primary antibody for PDK4 respectively. L.L.P would also like to thank  
326 Richard and Jocelyn Le Page for technical assistance in preparing the manuscript, and Asst. Prof.  
327 Myriam Chaumeil for valuable discussions.

328

329 **Conflicts of interest**

330 Lydia Le Page was supported in the form of a partial contribution to her D.Phil studies by  
331 AstraZeneca PLC, London, UK.

332 **References**

- 333 1. Allen DG, Morris PG, Orchardt CH, Pirolot JS. *A Nuclear Magnetic Resonance Study of*  
334 *Metabolism in the Ferret Heart during Hypoxia and Inhibition of Glycolysis*. Vol 361.; 1985.  
335 [https://www.ncbi.nlm.nih.gov/pmc/articles/PMC1192854/pdf/jphysiol00576-](https://www.ncbi.nlm.nih.gov/pmc/articles/PMC1192854/pdf/jphysiol00576-0195.pdf)  
336 [0195.pdf](https://www.ncbi.nlm.nih.gov/pmc/articles/PMC1192854/pdf/jphysiol00576-0195.pdf). Accessed October 16, 2018.
- 337 2. Williamson JR. Glycolytic control mechanisms. II. Kinetics of intermediate changes during  
338 the aerobic-anoxic transition in perfused rat heart. *J Biol Chem*. 1966;241(21):5026-  
339 5036. <http://www.ncbi.nlm.nih.gov/pubmed/4224561>. Accessed October 16, 2018.
- 340 3. Cole MA, Abd Jamil AH, Heather LC, et al. On the pivotal role of PPAR $\alpha$  in adaptation of  
341 the heart to hypoxia and why fat in the diet increases hypoxic injury. *FASEB J*. April 2016.  
342 doi:10.1096/fj.201500094R.
- 343 4. Heather LC, Cole MA, Tan J-JJ, et al. Metabolic adaptation to chronic hypoxia in cardiac  
344 mitochondria. *Basic Res Cardiol*. 2012;107(3):268. doi:10.1007/s00395-012-0268-2.
- 345 5. Mansor LS, Mehta K, Aksentijevic D, et al. Increased oxidative metabolism following  
346 hypoxia in the type 2 diabetic heart, despite normal hypoxia signalling and metabolic  
347 adaptation. *J Physiol*. 2016;594(2):307-320. doi:10.1113/JP271242.
- 348 6. Stembridge M, Ainslie PN, Donnelly J, et al. Cardiac structure and function in adolescent  
349 Sherpa; effect of habitual altitude and developmental stage. *Am J Physiol Circ Physiol*.  
350 2016;310(6):H740-H746. doi:10.1152/ajpheart.00938.2015.
- 351 7. de Theije C, Costes F, Langen RC, Pison C, Gosker HR. Hypoxia and muscle maintenance  
352 regulation: implications for chronic respiratory disease. *Curr Opin Clin Nutr Metab Care*.  
353 2011;14(6):548-553. doi:10.1097/MCO.0b013e32834b6e79.
- 354 8. Giussani DA, Camm EJ, Niu Y, et al. Developmental programming of cardiovascular  
355 dysfunction by prenatal hypoxia and oxidative stress. Calbet JAL, ed. *PLoS One*.  
356 2012;7(2):e31017. doi:10.1371/journal.pone.0031017.
- 357 9. Garvey JF, Taylor CT, McNicholas WT. Cardiovascular disease in obstructive sleep apnoea  
358 syndrome: the role of intermittent hypoxia and inflammation. *Eur Respir J*.



*Le Page et al: Assessing the response of cardiac metabolism to hypoxia with <sup>13</sup>C MRS*

- 359 2009;33(5):1195-1205. doi:10.1183/09031936.00111208.
- 360 10. Willam C, Maxwell PH, Nichols L, et al. HIF prolyl hydroxylases in the rat; organ  
361 distribution and changes in expression following hypoxia and coronary artery ligation. *J*  
362 *Mol Cell Cardiol.* 2006;41(1):68-77. doi:10.1016/j.yjmcc.2006.04.009.
- 363 11. Giordano FJ. Oxygen, oxidative stress, hypoxia, and heart failure. *J Clin Invest.*  
364 2005;115(3):500-508. doi:10.1172/JCI24408.
- 365 12. Prabhakar NR, Semenza GL. Adaptive and maladaptive cardiorespiratory responses to  
366 continuous and intermittent hypoxia mediated by hypoxia-inducible factors 1 and 2.  
367 *Physiol Rev.* 2012;92(3):967-1003. doi:10.1152/physrev.00030.2011.
- 368 13. Mason RP, Zhao D, Pacheco-Torres J, et al. Multimodality imaging of hypoxia in preclinical  
369 settings. *Q J Nucl Med Mol Imaging.* 2010;54(3):259-280.  
370 <http://www.ncbi.nlm.nih.gov/pubmed/20639813>. Accessed November 6, 2018.
- 371 14. Friedrich MG, Karamitsos TD. Oxygenation-sensitive cardiovascular magnetic resonance.  
372 *J Cardiovasc Magn Reson.* 2013;15(1):43. doi:10.1186/1532-429X-15-43.
- 373 15. Stalder AF, Schmidt M, Greiser A, et al. Robust cardiac BOLD MRI using an fMRI-like  
374 approach with repeated stress paradigms. *Magn Reson Med.* 2015;73(2):577-585.  
375 doi:10.1002/mrm.25164.
- 376 16. Davidson CQ, Phenix CP, Tai TC, Khaper N, Lees SJ. *Searching for Novel PET Radiotracers:*  
377 *Imaging Cardiac Perfusion, Metabolism and Inflammation.* Vol 8.; 2018.  
378 [www.ajnmni.us/ISSN:2160-8407/ajnmni0079469](http://www.ajnmni.us/ISSN:2160-8407/ajnmni0079469). Accessed November 6, 2018.
- 379 17. Gropler RJ, Siegel BA, Geltman EM. Myocardial uptake of carbon-11-acetate as an indirect  
380 estimate of regional myocardial blood flow. *J Nucl Med.* 1991;32(2):245-251.  
381 <http://www.ncbi.nlm.nih.gov/pubmed/1992027>. Accessed November 6, 2018.
- 382 18. Ardenkjaer-Larsen JH, Fridlund B, Gram A, et al. Increase in signal-to-noise ratio of >  
383 10,000 times in liquid-state NMR. *Proc Natl Acad Sci U S A.* 2003;100(18):10158-10163.  
384 doi:10.1073/pnas.1733835100.
- 385 19. Schroeder MA, Clarke K, Neubauer S, Tyler DJ. Hyperpolarized magnetic resonance: a

*Le Page et al: Assessing the response of cardiac metabolism to hypoxia with <sup>13</sup>C MRS*

- 386 novel technique for the in vivo assessment of cardiovascular disease. *Circulation*.  
387 2011;124(14):1580-1594. doi:10.1161/CIRCULATIONAHA.111.024919.
- 388 20. Laustsen C, Lycke S, Palm F, et al. High altitude may alter oxygen availability and renal  
389 metabolism in diabetics as measured by hyperpolarized [1-(<sup>13</sup>C)]pyruvate magnetic  
390 resonance imaging. *Kidney Int*. 2013;86(1):67-74. doi:10.1038/ki.2013.504.
- 391 21. Hanahan D, Weinberg RA. Hallmarks of cancer: the next generation. *Cell*.  
392 2011;144(5):646-674. doi:10.1016/j.cell.2011.02.013.
- 393 22. Hardee ME, Dewhirst MW, Agarwal N, Sorg BS. *Novel Imaging Provides New Insights into*  
394 *Mechanisms of Oxygen Transport in Tumors*.  
395 <https://www.ncbi.nlm.nih.gov/pmc/articles/PMC2841217/pdf/nihms184476.pdf>.  
396 Accessed October 16, 2018.
- 397 23. Iversen AB, Ringgaard S, Laustsen C, et al. Hyperpolarized magnetic resonance  
398 spectroscopy for assessing tumor hypoxia. *Acta Oncol*. September 2015:1-6.  
399 doi:10.3109/0284186X.2015.1070964.
- 400 24. Bohndiek SE, Kettunen MI, Hu D, et al. Hyperpolarized [1-<sup>13</sup>C]-Ascorbic and  
401 Dehydroascorbic Acid: Vitamin C as a Probe for Imaging Redox Status in Vivo. *J Am Chem*  
402 *Soc*. 2011;133(30):11795-11801. doi:10.1021/ja2045925.
- 403 25. Keshari KR, Kurhanewicz J, Bok R, Larson PEZ, Vigneron DB, Wilson DM. Hyperpolarized  
404 <sup>13</sup>C dehydroascorbate as an endogenous redox sensor for in vivo metabolic imaging.  
405 *Proc Natl Acad Sci U S A*. 2011;108(46):18606-18611. doi:10.1073/pnas.1106920108.
- 406 26. Timm KN, Hu D, Williams M, et al. Assessing oxidative stress in tumors by measuring the  
407 rate of hyperpolarized [1-<sup>13</sup>C]dehydroascorbic acid reduction using <sup>13</sup>C magnetic  
408 resonance spectroscopy. *J Biol Chem*. December 2016:jbc.M116.761536.  
409 doi:10.1074/jbc.M116.761536.
- 410 27. Schroeder M, Laustsen C. Imaging oxygen metabolism with hyperpolarized magnetic  
411 resonance: a novel approach for the examination of cardiac and renal function. *Biosci*  
412 *Rep*. 2017;37(1):BSR20160186. doi:10.1042/BSR20160186.

*Le Page et al: Assessing the response of cardiac metabolism to hypoxia with <sup>13</sup>C MRS*

- 413 28. Marshall JM, Thomas T, Turner L. A link between adenosine, ATP-sensitive K<sup>+</sup> channels,  
414 potassium and muscle vasodilatation in the rat in systemic hypoxia. *J Physiol*.  
415 1993;472:1-9.  
416 <http://www.pubmedcentral.nih.gov/articlerender.fcgi?artid=1160471&tool=pmcentrez>  
417 &rendertype=abstract. Accessed June 2, 2014.
- 418 29. Schroeder MA, Cochlin LE, Heather LC, Clarke K, Radda GK, Tyler DJ. In vivo assessment  
419 of pyruvate dehydrogenase flux in the heart using hyperpolarized carbon-13 magnetic  
420 resonance. *Proc Natl Acad Sci U S A*. 2008;105(33):12051-12056.  
421 doi:10.1073/pnas.0805953105.
- 422 30. Boehm EA, Jones BE, Radda GK, Veech RL, Clarke K. Increased uncoupling proteins and  
423 decreased efficiency in palmitate-perfused hyperthyroid rat heart. *Am J Physiol - Hear*  
424 *Circ Physiol*. 2000;280(3):977-983. <http://www.ncbi.nlm.nih.gov/pubmed/11179038>.  
425 Accessed May 21, 2014.
- 426 31. Naressi A, Couturier C, Devos JM, et al. Java-based graphical user interface for MRUI, a  
427 software package for quantitation of in vivo/medical magnetic resonance spectroscopy  
428 signals. *Comput Biol Med*. 2001;31(4):269-286.  
429 <http://view.ncbi.nlm.nih.gov/pubmed/11390270>.
- 430 32. Zierhut ML, Yen Y-F, Chen AP, et al. Kinetic modeling of hyperpolarized <sup>13</sup>C1-pyruvate  
431 metabolism in normal rats and TRAMP mice. *J Magn Reson*. 2010;202(1):85-92.  
432 doi:10.1016/j.jmr.2009.10.003.
- 433 33. Atherton HJ, Schroeder MA, Dodd MS, et al. Validation of the in vivo assessment of  
434 pyruvate dehydrogenase activity using hyperpolarised <sup>13</sup>C MRS. *NMR Biomed*.  
435 2011;24(2):201-208. doi:10.1002/nbm.1573.
- 436 34. Heather LC, Pates KM, Atherton HJ, et al. Differential translocation of the fatty acid  
437 transporter, FAT/CD36, and the glucose transporter, GLUT4, coordinates changes in  
438 cardiac substrate metabolism during ischemia and reperfusion. *Circ Heart Fail*.  
439 2013;6(5):1058-1066. doi:10.1161/CIRCHEARTFAILURE.112.000342.

*Le Page et al: Assessing the response of cardiac metabolism to hypoxia with <sup>13</sup>C MRS*

- 440 35. Kinnula VL, Hassinen I. Metabolic adaptation to hypoxia. Redox state of the cellular free  
441 NAD pools, phosphorylation state of the adenylate system and the (Na<sup>+</sup>-K<sup>+</sup>)-stimulated  
442 ATP-ase in rat liver. *Acta Physiol Scand.* 1978;104(1):109-116. doi:10.1111/j.1748-  
443 1716.1978.tb06256.x.
- 444 36. Bärtsch P, Simon ; J, Gibbs R. Effect of Altitude on the Heart and the Lungs Effects of  
445 Exposure to High Altitude on the Normal Cardiovascular System Circulation  
446 Contemporary Reviews in Cardiovascular Medicine. 2007.  
447 doi:10.1161/CIRCULATIONAHA.106.650796.
- 448 37. Westerterp KR. *Energy and Water Balance at High Altitude.* Vol 16.; 2001.  
449 [www.physiology.org/journal/physiologyonline](http://www.physiology.org/journal/physiologyonline). Accessed November 7, 2018.
- 450 38. Tschop M, Strasburger C, Hartmann G, Biollaz J, Bartsch P. *Raised Leptin Concentrations at*  
451 *High Altitude Associated with Loss of Appetite.* Vol 352.; 1998.  
452 <https://www.thelancet.com/action/showPdf?pii=S0140-6736%2805%2979760-9>.  
453 Accessed November 7, 2018.
- 454 39. Gruber M, Hu C-J, Johnson RS, et al. *Acute Postnatal Ablation of Hif-2 Results in Anemia;*  
455 2007. [www.pnas.org/cgi/content/full/](http://www.pnas.org/cgi/content/full/). Accessed November 8, 2018.
- 456 40. Kapitsinou PP, Liu Q, Unger TL, et al. Hepatic HIF-2 regulates erythropoietic responses to  
457 hypoxia in renal anemia. *Blood.* 2010;116(16):3039-3048. doi:10.1182/blood-2010-02-  
458 270322.
- 459 41. Hu C-J, Wang L-Y, Chodosh LA, Keith B, Simon MC. Differential Roles of Hypoxia-Inducible  
460 Factor 1 (HIF-1) and HIF-2 in Hypoxic Gene Regulation. *Mol Cell Biol.* 2003;23(24):9361-  
461 9374. doi:10.1128/MCB.23.24.9361-9374.2003.
- 462 42. Firth JD, Ebert BL, Ratcliffe PJ. Hypoxic Regulation of Lactate Dehydrogenase A. *J Biol*  
463 *Chem.* 1995;270(36):21021-21027. doi:10.1074/jbc.270.36.21021.
- 464 43. Kim J, Tchernyshyov I, Semenza GL, et al. HIF-1-mediated expression of pyruvate  
465 dehydrogenase kinase: a metabolic switch required for cellular adaptation to hypoxia.  
466 *Cell Metab.* 2006;3(3):177-185. doi:10.1016/j.cmet.2006.02.002.

*Le Page et al: Assessing the response of cardiac metabolism to hypoxia with <sup>13</sup>C MRS*

- 467 44. Papandreou I, Cairns RA, Fontana L, Lim AL, Denko NC. HIF-1 mediates adaptation to  
468 hypoxia by actively downregulating mitochondrial oxygen consumption. *Cell Metab.*  
469 2006;3(3):187-197. doi:10.1016/j.cmet.2006.01.012.
- 470 45. Aragonés J, Schneider M, Van Geyte K, et al. Deficiency or inhibition of oxygen sensor  
471 Phd1 induces hypoxia tolerance by reprogramming basal metabolism. *Nat Genet.*  
472 2008;40(2):170-180. doi:10.1038/ng.2007.62.
- 473 46. Le Moine CMR, Morash AJ, McClelland GB. Changes in HIF-1 $\alpha$  protein, pyruvate  
474 dehydrogenase phosphorylation, and activity with exercise in acute and chronic hypoxia.  
475 *Am J Physiol Regul Integr Comp Physiol.* 2011;301(4):R1098-104.  
476 doi:10.1152/ajpregu.00070.2011.
- 477 47. Lydell CP, Chan A, Wambolt RB, et al. Pyruvate dehydrogenase and the regulation of  
478 glucose oxidation in hypertrophied rat hearts. *Cardiovasc Res.* 2002;53(4):841-851.  
479 <http://www.pubmedcentral.nih.gov/articlerender.fcgi?artid=2131743&tool=pmcentrez>  
480 [&rendertype=abstract](http://www.pubmedcentral.nih.gov/articlerender.fcgi?artid=2131743&tool=pmcentrez&rendertype=abstract).
- 481 48. Seymour A-ML, Giles L, Ball V, et al. In Vivo Assessment of Cardiac Metabolism and  
482 Function in the Abdominal Aortic Banding Model of Compensated Cardiac Hypertrophy.  
483 *Cardiovasc Res.* March 2015:cvv101-. doi:10.1093/cvr/cvv101.
- 484 49. Le Moine CMR, Morash AJ, McClelland GB. Changes in HIF-1 $\alpha$  protein, pyruvate  
485 dehydrogenase phosphorylation, and activity with exercise in acute and chronic hypoxia.  
486 *Am J Physiol Integr Comp Physiol.* 2011;301(4):R1098-R1104.  
487 doi:10.1152/ajpregu.00070.2011.
- 488 50. Atherton HJ, Schroeder MA, Dodd MS, et al. Validation of the in vivo assessment of  
489 pyruvate dehydrogenase activity using hyperpolarised <sup>13</sup>C MRS. *NMR Biomed.*  
490 2011;24(2):201-208. doi:10.1002/nbm.1573.
- 491 51. Lau AZ, Chen AP, Ghugre NR, et al. Rapid multislice imaging of hyperpolarized <sup>13</sup>C  
492 pyruvate and bicarbonate in the heart. *Magn Reson Med.* 2010;64(5):1323-1331.  
493 doi:10.1002/mrm.22525.

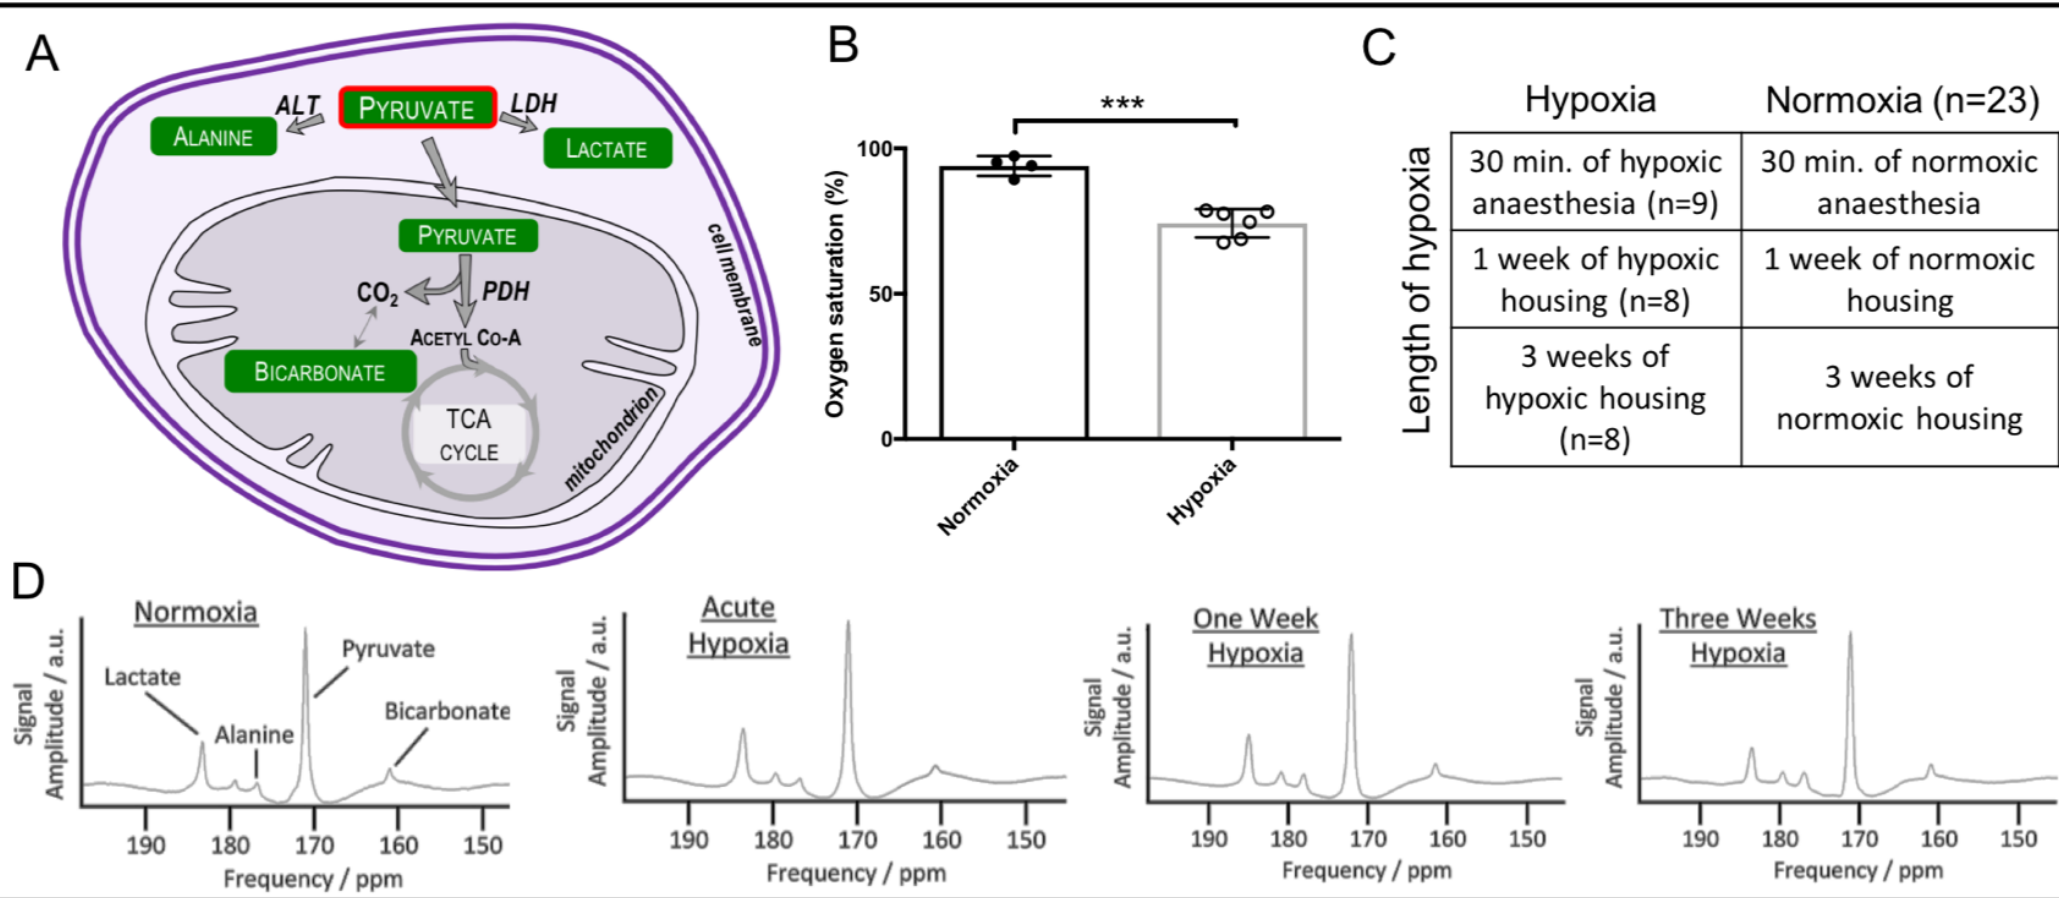

**Figure 1:** (A) Biochemical pathways visualized using HP [1-13C] pyruvate (outlined in red). (B) oxygen saturation of animals housed in the hypoxic chamber \*\*\*p=0.0001. (C) Experimental animal groups for three lengths of hypoxic exposure. Normoxic data subsequently treated as one group, n=23. (D) example summed spectra from each timepoint.



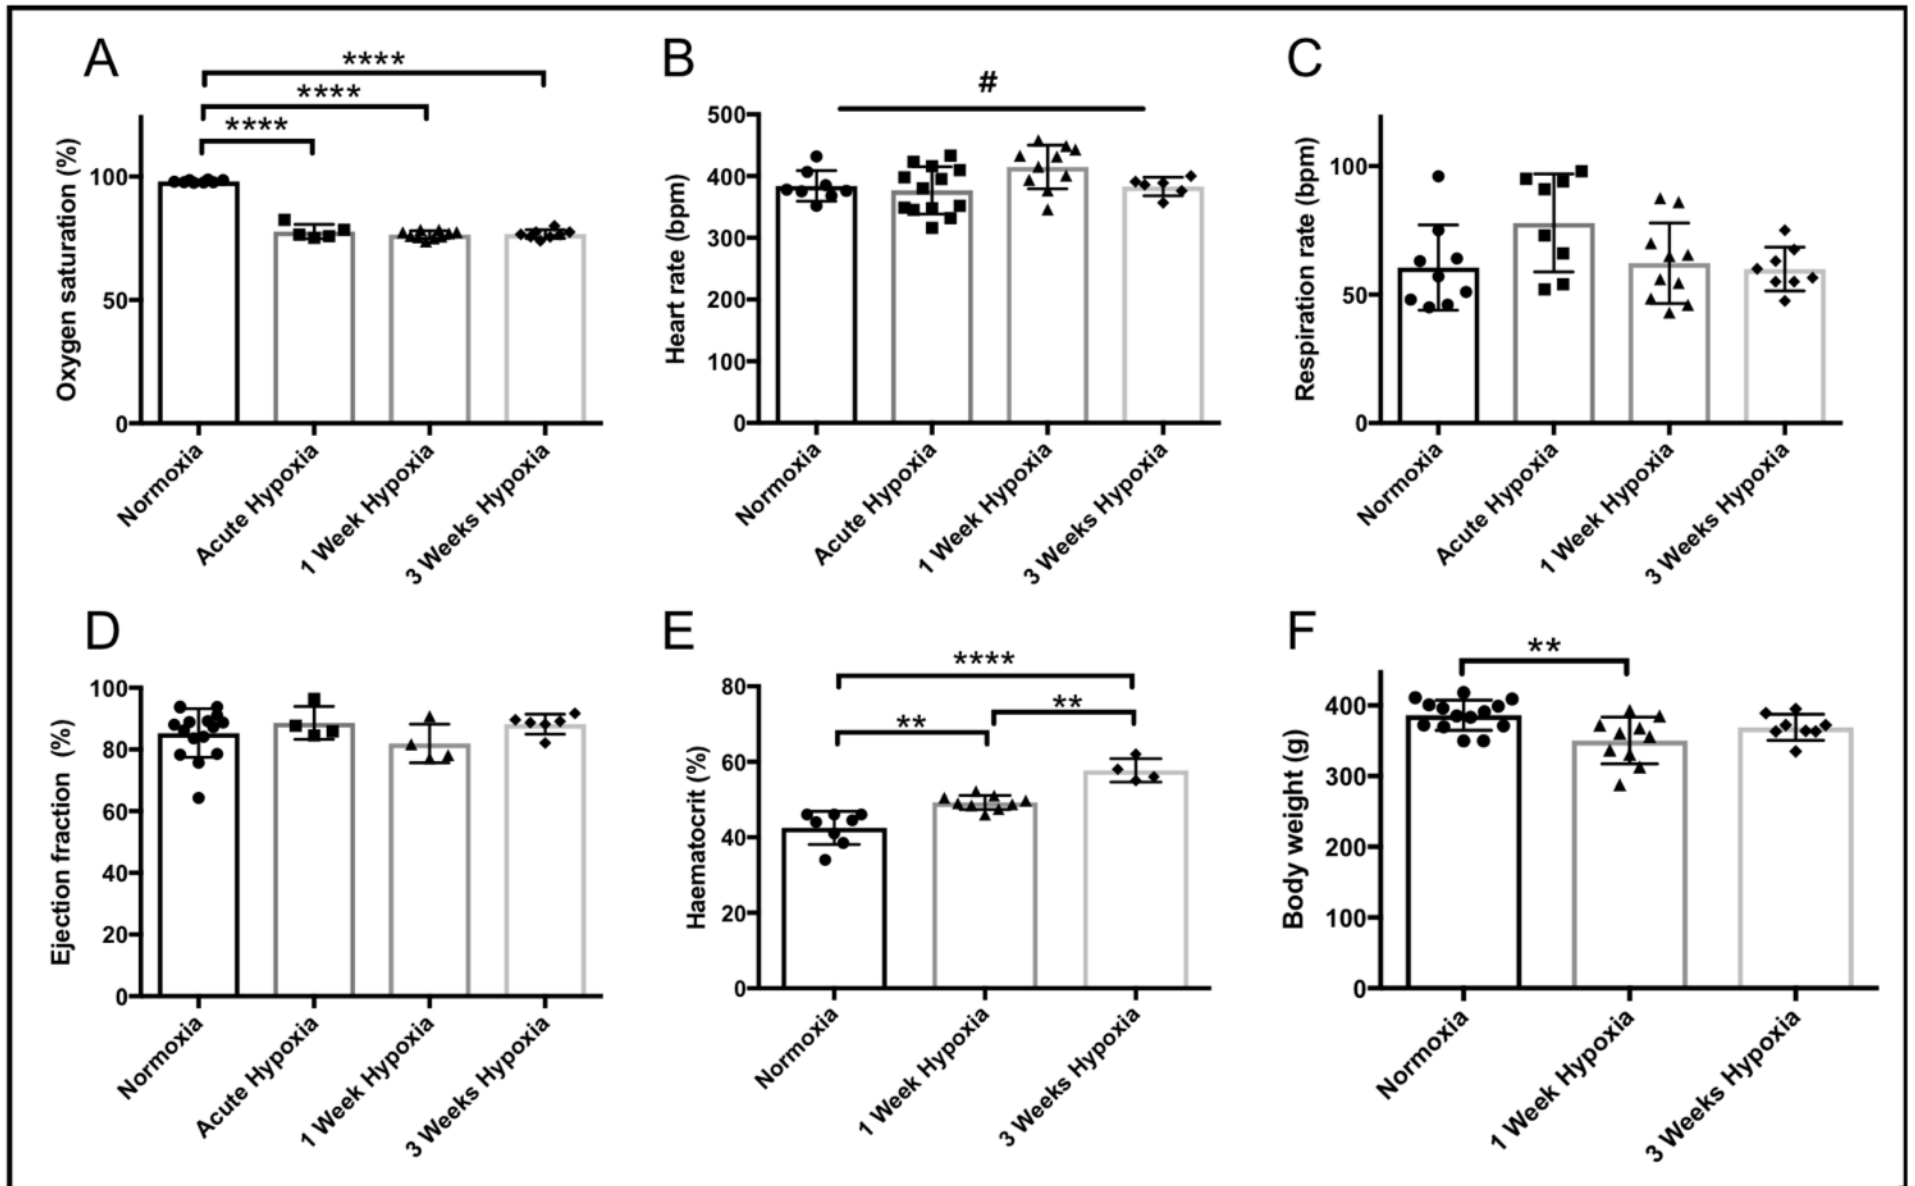

**Figure 2:** Effects of hypoxic exposure on **(A)** blood oxygen saturation, **(B)** heart rate (# $p=0.051$ ), **(C)** respiration rate, **(D)** cardiac ejection fraction, **(E)** haematocrit levels, and **(F)** body weight, all in comparison with normoxically-housed animal data; \*\* $p<0.01$ , \*\*\*\* $p<0.0001$ .

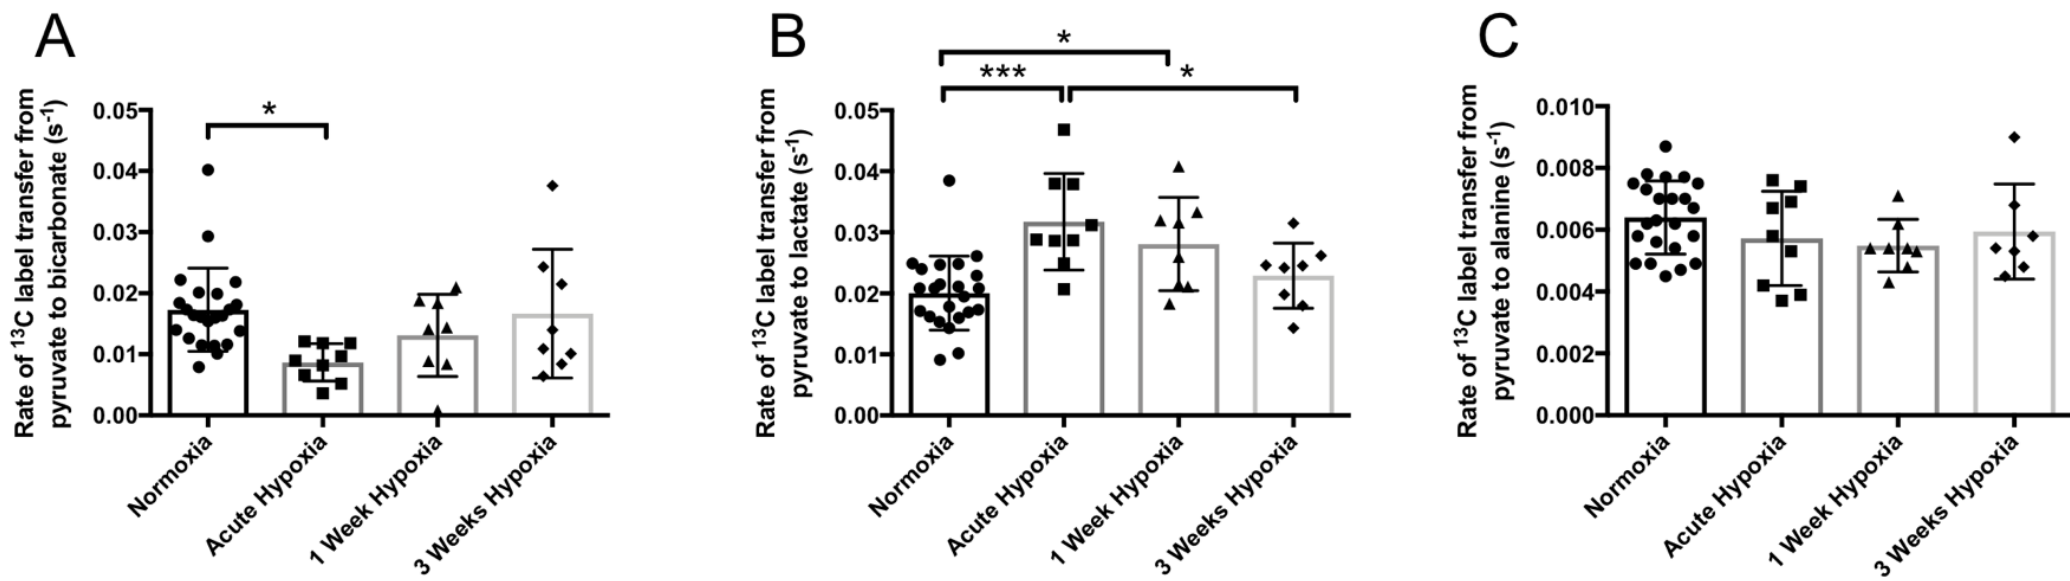

**Figure 3:** Following normoxia, 30 minutes, 1 week, and 3 weeks of hypoxic exposure, rates of HP  $^{13}\text{C}$  label transfer from HP [1- $^{13}\text{C}$ ] pyruvate to (A) bicarbonate, (B) lactate, and (C) alanine; \* $p < 0.05$ , \*\*\* $p < 0.001$



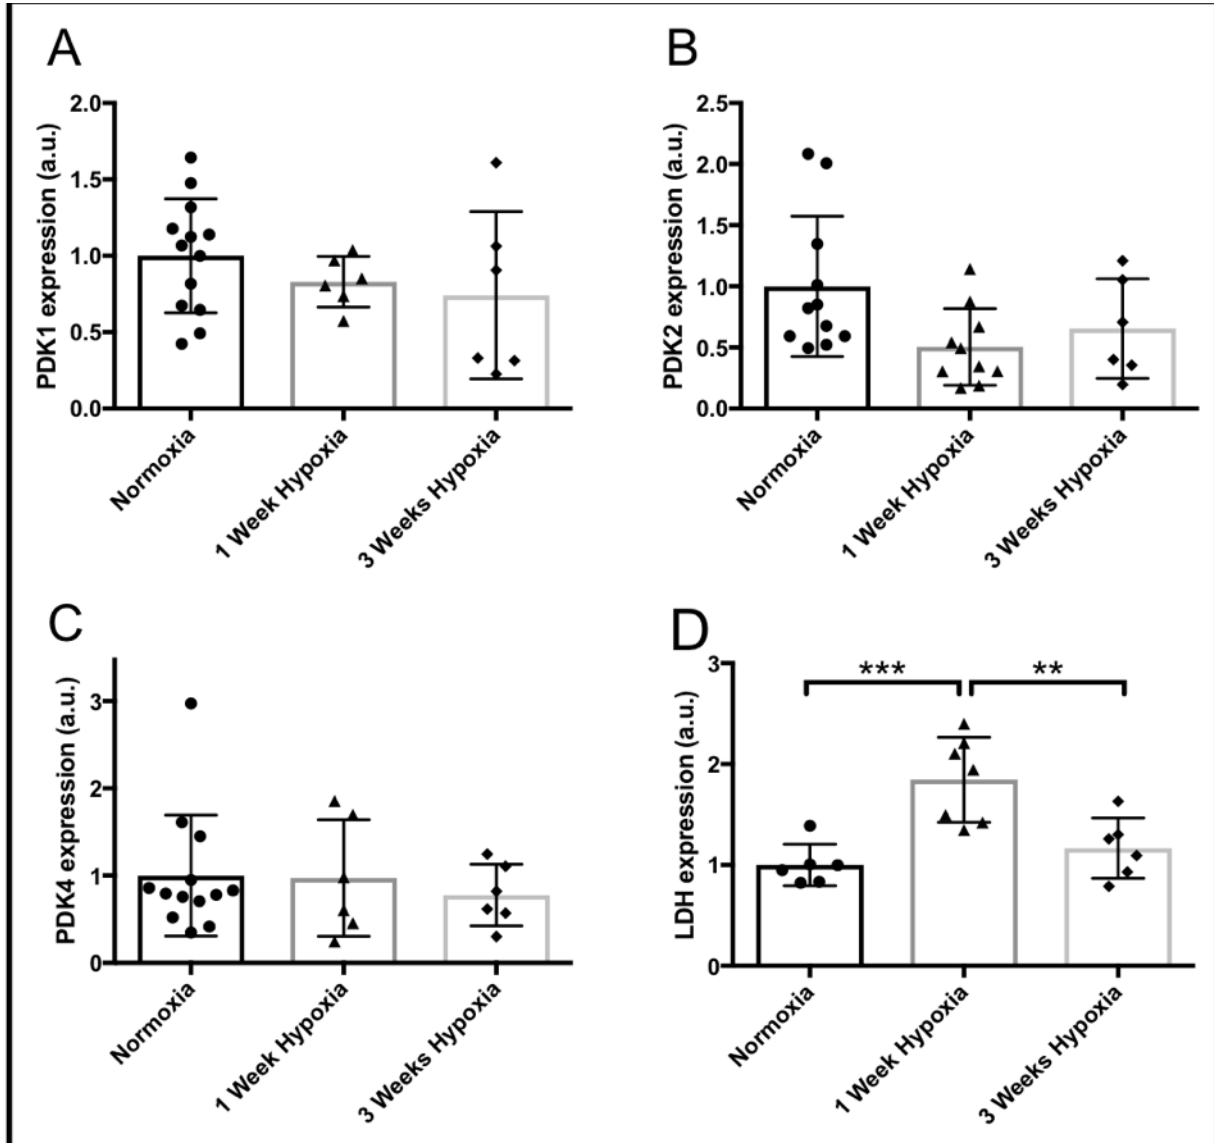

**Figure 4:** Western blot data from normoxic, 1 week hypoxic, and 3 weeks hypoxic exposure showing protein expression levels of **(A)** PDK 1, **(B)** PDK2, **(C)** PDK4, and **(D)** LDH, \*\*p<0.01, \*\*\*p<0.001
